# Supplementary material for: Micron-sized iron oxide functionalized with hydrophobic mesoporous sheets for the Ni–Fe battery
Source: Royal Society of Chemistry journal article supplement (doi:10.1039/d0se01687j), 2021-01-01
Supplement: d0se01687j1.pdf [file d0se01687j1.pdf]

## Supporting Information

### **Micron iron oxides functionalized with hydrophobic mesoporous sheets for Ni-Fe battery**

Yicong Xiao,<sup>a,c</sup> Ruimin Ding,<sup>\*b</sup> Xinmin Cui,<sup>a</sup> Huixiang Wang,<sup>b</sup> Liancheng Wang,<sup>b</sup>  
MengChao Wang,<sup>b</sup> Baolong Niu,<sup>\*a,c</sup> and Baoliang Lv,<sup>\*b</sup>

*a. College of Materials Science and Engineering, Taiyuan University of Technology,  
Taiyuan 030024, China.*

*b. State Key Laboratory of Coal Conversion, Institute of Coal Chemistry, Chinese  
Academy of Sciences, Taiyuan 030001, China.*

*c. Key Laboratory of Interface Science and Engineering in Advanced Materials,  
Taiyuan University of Technology, Ministry of Education, Taiyuan 030024, China.*

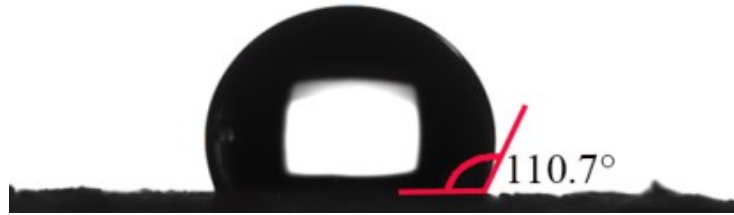

Figure S1 The water contact angle measurement of industrial  $\text{Fe}_3\text{O}_4$ -por after cycling test

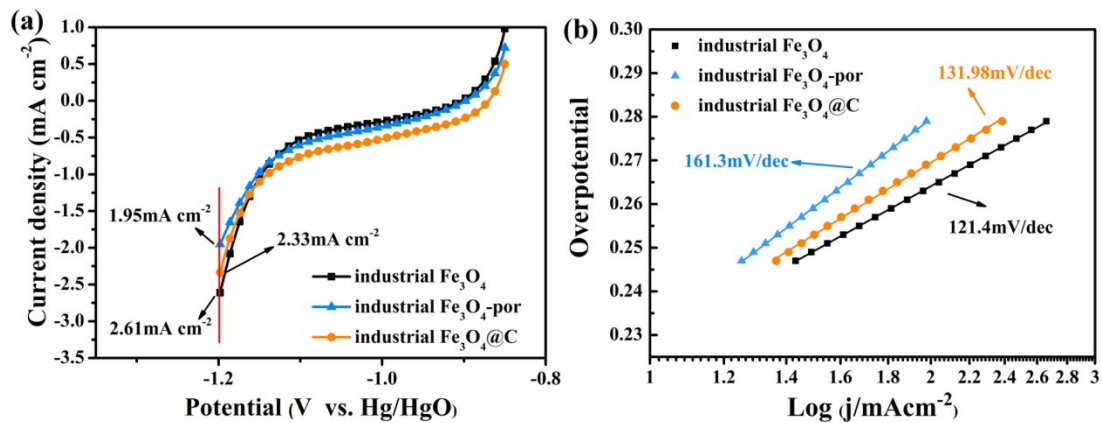

Figure S2 (a) Polarization curves of industrial  $\text{Fe}_3\text{O}_4$ , industrial  $\text{Fe}_3\text{O}_4$ -por and industrial  $\text{Fe}_3\text{O}_4$ @C. (b) corresponding Tafel plots derived from (a).

Owing to that the reduction reaction of  $\text{Fe}_3\text{O}_4$  electrodes and hydrogen evolution reaction may occur at the same potential, the polarization curves were measured after  $\text{Fe}_3\text{O}_4$  electrodes were fully charged to eliminate the possible effect of the reduction reaction. The Tafel slopes of industrial  $\text{Fe}_3\text{O}_4$ , industrial  $\text{Fe}_3\text{O}_4$ -por and industrial  $\text{Fe}_3\text{O}_4$ @C is 121.4 mV/dec, 161.3 mV/dec and 131.98 mV/dec, respectively. At -1.2 V (vs. Hg/HgO), the current density of hydrogen evolution on industrial  $\text{Fe}_3\text{O}_4$ , industrial  $\text{Fe}_3\text{O}_4$ -por and industrial  $\text{Fe}_3\text{O}_4$ @C is 2.61 mA/cm<sup>2</sup>, 1.95 mA/cm<sup>2</sup> and 2.33 mA/cm<sup>2</sup>, respectively. The Tafel slope of industrial  $\text{Fe}_3\text{O}_4$  is larger than other two electrodes but its current density of hydrogen evolution does not decrease much. The results indicate that hydrophobic mesoporous  $\text{Fe}_3\text{O}_4$  sheets can inhibit hydrogen evolution but not effectively. The slight inhibition of hydrogen evolution is not the vital factor that influences anode performance.
